# Supplementary material for: Identification of MicroRNAs as Potential Prognostic Markers in Ependymoma
Source: PubMed Central journal article supplement (PMC3203863; doi:10.1371/journal.pone.0025114), 2011-10-28
Supplement: pone.0025114.s004.pdf [file pone.0025114.s004.pdf]

|         |        |                           |                |                     |                               |   |
|---------|--------|---------------------------|----------------|---------------------|-------------------------------|---|
| 4380949 | 001539 | UAUGCAUUGUAUUUUUAGGUCC    | hsa-miR-586    | hsa-miR-586         | MIMAT0003252                  | + |
| 4380950 | 001540 | UUUCCAAUAGGUGAUGAGUCAC    | hsa-miR-587    | hsa-miR-587         | MIMAT0003253                  | + |
| 4380951 | 001541 | CAAGAACCUCAGUUGCUUUUUGU   | hsa-miR-548b   | hsa-miR-548b        | MIMAT0003254                  | + |
| 4380952 | 001542 | UUGGCCACAAUGGGUJAGAAC     | hsa-miR-588    | hsa-miR-588         | MIMAT0003255                  | + |
| 4380953 | 001543 | UCAGAACAUAUGCCGGUJCCAGAG  | hsa-miR-589    | hsa-miR-589         | MIMAT0003256                  | + |
| 4380954 | 001544 | UGUCUUAUCUCCUCAGGCACAU    | hsa-miR-550    | hsa-miR-550         | MIMAT0003257                  | + |
| 4380955 | 001545 | AGACCAUGGGUJUCUJAUUGU     | hsa-miR-591    | hsa-miR-591         | MIMAT0003259                  | + |
| 4380957 | 001547 | AGGCACCAGCCAGGCAUUGCUCAGC | hsa-miR-593    | hsa-miR-593         | MIMAT0003261                  | + |
| 4380958 | 001548 | CCCAUCUGGGGUGGCCUGGACUJUL | hsa-miR-594    | hsa-miR-594         | MIMAT0003262                  | + |
| 4380959 | 001550 | AAGCCUCCCGGCUCCUCCGG      | hsa-miR-596    | hsa-miR-596         | MIMAT0003264                  | + |
| 4380960 | 001551 | UGUGUCACUCGAGUACACUCUGU   | hsa-miR-597    | hsa-miR-597         | MIMAT0003265                  | + |
| 4380961 | 001553 | ACAGUCUGUCAGGUGUGGAGC     | hsa-miR-622    | hsa-miR-622         | MIMAT0003291                  | + |
| 4380962 | 001554 | GUUGUGUCAGUUUAUCAAAAC     | hsa-miR-599    | hsa-miR-599         | MIMAT0003267                  | + |
| 4380963 | 001556 | ACUUAACAGACAAGGACCUUUGCUC | hsa-miR-600    | hsa-miR-600         | MIMAT0003268                  | + |
| 4380964 | 001557 | UAGUACCAGUACCUUGUGUUCA    | hsa-miR-624    | hsa-miR-624         | MIMAT0003293                  | + |
| 4380965 | 001558 | UGGUCUAGGAAUUGUGGAGGAG    | hsa-miR-601    | hsa-miR-601         | MIMAT0003269                  | + |
| 4380966 | 001559 | AGCUGUCUGAAAUGUCUU        | hsa-miR-626    | hsa-miR-626         | MIMAT0003295                  | + |
| 4380969 | 001562 | GUUCUCCCAACGUAAGCCCAAGC   | hsa-miR-629    | hsa-miR-629         | MIMAT0003298                  | + |
| 4381007 | 001604 | UUUAGGAUUAAGCUAGACUUUUG   | hsa-miR-651    | hsa-miR-651         | MIMAT0003321                  | + |
| 4381008 | 001605 | CAAAAACCACAGUUUUUUUUGC    | hsa-miR-548d   | hsa-miR-548d        | MIMAT0003323                  | + |
| 4380917 | 001283 | CGGGUGGACUACGGAUCCAUUUU   | hsa-miR-363#   | hsa-miR-363#::rno-n | MIMAT0003209::MIMAT0003385::M | + |
| 4378102 | 001285 | AUUCGUACAGGGUUAUCACACUU   | hsa-miR-487b   | bta-miR-487b::hsa-n | MIMAT0003180::MIMAT0003847    | + |
| 4380924 | 001514 | CUUGGUUCAGGGAGGGUCCCA     | hsa-miR-659    | hsa-miR-659         | MIMAT0003337                  | + |
| 4380934 | 001524 | G AUGAGUCUUAUUAUUAUG      | hsa-miR-556    | hsa-miR-556         | MIMAT0003220                  | + |
| 4380936 | 001526 | UGAGUCUGUACCAAAA          | hsa-miR-558    | hsa-miR-558         | MIMAT0003222                  | + |
| 4380967 | 001560 | GUGAGUCUCUAAAAGAGGGA      | hsa-miR-627    | hsa-miR-627         | MIMAT0003296                  | + |
| 4380970 | 001563 | AGUAUUUCUACACAGGGAGGU     | hsa-miR-630    | hsa-miR-630         | MIMAT0003299                  | + |
| 4380971 | 001564 | AGACCUAGCCAGACCCUAGC      | hsa-miR-631    | hsa-miR-631         | MIMAT0003300                  | + |
| 4380972 | 001566 | CACACACUCAAUUUACUUUUGC    | hsa-miR-603    | hsa-miR-603         | MIMAT0003271                  | + |
| 4380974 | 001569 | AAACUACUGAAAUAAGAAU       | hsa-miR-606    | hsa-miR-606         | MIMAT0003274                  | + |
| 4380975 | 001570 | GUUCAAUUCAGAUUAUAAC       | hsa-miR-607    | hsa-miR-607         | MIMAT0003275                  | + |
| 4380976 | 001571 | AGGGGUGGUGGAGGACGCCG      | hsa-miR-608    | hsa-miR-608         | MIMAT0003276                  | + |
| 4380978 | 001573 | AGGGGUGUUCUCUACUCUCU      | hsa-miR-609    | hsa-miR-609         | MIMAT0003277                  | + |
| 4380979 | 001574 | CUAAUAGUAUUAACCAUAAA      | hsa-miR-633    | hsa-miR-633         | MIMAT0003303                  | + |
| 4380987 | 001583 | AUCGUGCCGGUUGGAGCGCUGU    | hsa-miR-639    | hsa-miR-639         | MIMAT0003309                  | + |
| 4380989 | 001586 | AGGAAUUGUCCUUCUUGCC       | hsa-miR-613    | hsa-miR-613         | MIMAT0003281                  | + |
| 4380990 | 001587 | GAACGCCUGUUCUUGCCAGGUGG   | hsa-miR-614    | hsa-miR-614         | MIMAT0003282                  | + |
| 4380991 | 001588 | UCCGAGCCUGGGUCUCCUCU      | hsa-miR-615    | hsa-miR-615         | MIMAT0003283                  | + |
| 4380992 | 001589 | ACUAAAACCCUUCAGUGACUU     | hsa-miR-616    | hsa-miR-616         | MIMAT0003284                  | + |
| 4380993 | 001590 | CAAAAUCUCAAUUUACUUUUGC    | hsa-miR-548c   | hsa-miR-548c        | MIMAT0003285                  | + |
| 4380994 | 001591 | AGACUUCUCAAUUUGAGGUGGC    | hsa-miR-617    | hsa-miR-617         | MIMAT0003286                  | + |
| 4380995 | 001592 | GUCCUUCUCAAUUGUGUCUUG     | hsa-miR-642    | hsa-miR-642         | MIMAT0003312                  | + |
| 4380996 | 001593 | AAACUCUACUUGUCCUUCUGAGU   | hsa-miR-618    | hsa-miR-618         | MIMAT0003287                  | + |
| 4380999 | 001596 | AGUGGUCUUCUUAAGAGC        | hsa-miR-644    | hsa-miR-644         | MIMAT0003314                  | + |
| 4381000 | 001597 | UCUAGGUCUGUACUGCUGA       | hsa-miR-645    | hsa-miR-645         | MIMAT0003315                  | + |
| 4381002 | 001599 | AAGCAGCUGCCUCUGAGGC       | hsa-miR-646    | hsa-miR-646         | MIMAT0003316                  | + |
| 4381003 | 001600 | GUGGUCGACUCACUUCUUUC      | hsa-miR-647    | hsa-miR-647         | MIMAT0003317                  | + |
| 4381005 | 001602 | AAACCUUGUGUUAUUAAGAGUC    | hsa-miR-649    | hsa-miR-649         | MIMAT0003319                  | + |
| 4381006 | 001603 | AGGAGGACGCGUCUCAGGAC      | hsa-miR-650    | hsa-miR-650         | MIMAT0003320                  | + |
| 4381009 | 001606 | UGCCUGGGUCUCUGGCCUGCGGU   | hsa-miR-661    | hsa-miR-661         | MIMAT0003324                  | + |
| 4381010 | 001607 | UCCACGUUGUGGCCACGACG      | hsa-miR-662    | hsa-miR-662         | MIMAT0003325                  | + |
| 4381011 | 001608 | AGGCAGUUAUUUGUAGCUGGC     | hsa-miR-449b   | hsa-miR-449b        | MIMAT0003327                  | + |
| 4381012 | 001609 | UUGAAACAUCUCUACUGAAC      | hsa-miR-653    | hsa-miR-653         | MIMAT0003328                  | + |
| 4381013 | 001610 | UAGUAGACCAGUAUAGCGUACG    | hsa-miR-411    | hsa-miR-411         | MIMAT0003329                  | + |
| 4381014 | 001611 | UGGUGGCGCCAGAAUUGUC       | hsa-miR-654    | hsa-miR-654         | MIMAT0003330                  | + |
| 4381017 | 001614 | GUCGCUCCGGGUGGCCCA        | hsa-miR-572    | hsa-miR-572         | MIMAT0003237                  | + |
| 4381020 | 001617 | GAGCCAGUUGGACAGGAGC       | hsa-miR-575    | hsa-miR-575         | MIMAT0003240                  | + |
| 4381021 | 001618 | AUUCUAAUUUCUCCACGUCUUUG   | hsa-miR-576    | hsa-miR-576         | MIMAT0003241                  | + |
| 4381022 | 001619 | CUUCUUGUCUCUAGGAUUUG      | hsa-miR-578    | hsa-miR-578         | MIMAT0003243                  | + |
| 4381023 | 001620 | AUUCUAAUUGUAUAAACCGCGAU   | hsa-miR-579    | hsa-miR-579         | MIMAT0003244                  | + |
| 4381024 | 001621 | UUGAGAAUUGAUAUUAUAGG      | hsa-miR-580    | hsa-miR-580         | MIMAT0003245                  | + |
| 4381027 | 001625 | UGGGCUUAUCUGUAUGCUA       | hsa-miR-585    | hsa-miR-585         | MIMAT0003250                  | + |
| 4381028 | 001800 | UAUAUCUGCCUGGUAUUGAGAC    | hsa-miR-200b   | hsa-miR-200b::mmu   | MIMAT0000233::MIMAT0000318::M | + |
| 4381032 | 001821 | UCAGGCUACAGUCCUCCCGAU     | hsa-miR-484    | bta-miR-484::hsa-mi | MIMAT0002174::MIMAT0003127::M | + |
| 4381034 | 001823 | AAGUGCUGUACUAGCUGAGGUC    | hsa-miR-512-3p | hsa-miR-512-3p      | MIMAT0002823                  | + |
| 4373383 | 001006 | GAUGACCCAGGUAACUCUGAGUGU  | RNU48          | RNU48               | NR_00274E_U48                 | + |
| 4373384 | 001094 | CCUGAUGAUGUAAGCAAUGCUGA   | RNU44          | RNU44               | NR_00275C_U44                 | + |
